# Supplementary material for: PPTC7 maintains mitochondrial protein content by suppressing receptor-mediated mitophagy
Source: PubMed Central journal article supplement (PMC10575892; doi:10.1038/s41467-023-42069-w), 2023-10-13
Supplement: 41467_2023_42069_MOESM1_ESM.pdf [file 41467_2023_42069_MOESM1_ESM.pdf]

## **SUPPLEMENTARY INFORMATION**

*PPTC7 maintains mitochondrial protein content by suppressing receptor-mediated mitophagy*

Niemi et al.

# Supplementary Figure 1

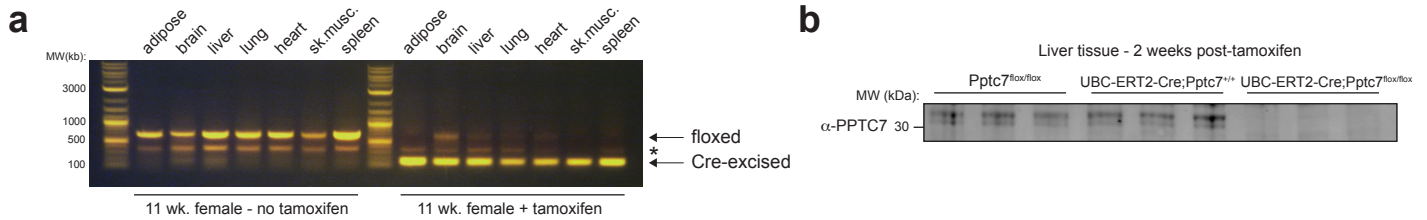

**c** Significantly upregulated proteins in *Pptc7* KO liver tissue

| Rank | Gene symbol   | Pathway/Function (MitoCarta 3.0)                                                                                                                |
|------|---------------|-------------------------------------------------------------------------------------------------------------------------------------------------|
| 1    | Pdk4          | Metabolism > Carbohydrate metabolism > Pyruvate metabolism                                                                                      |
| 2    | Slc25a47      | Small molecule transport > SLC25A family                                                                                                        |
| 3    | <b>Bnip3</b>  | <b>Mitochondrial dynamics and surveillance &gt; Apoptosis</b>                                                                                   |
| 4    | Aifm2         | Metabolism > Detoxification > ROS and glutathione metabolism   Mitochondrial dynamics and surveillance > Apoptosis                              |
| 5    | Abcd3         | Small molecule transport > ABC transporters                                                                                                     |
| 6    | <b>Bnip3l</b> | <b>Mitochondrial dynamics and surveillance &gt; Apoptosis</b>                                                                                   |
| 7    | Aldh11l       | Metabolism > Vitamin metabolism > Folate and 1-C metabolism                                                                                     |
| 8    | Stom          | MXP (no annotated function)                                                                                                                     |
| 9    | Cmpk2         | Metabolism > Nucleotide metabolism > Nucleotide synthesis and processing                                                                        |
| 10   | Trit1         | Mitochondrial central dogma > mtRNA metabolism > mt-rRNA modifications   Mitochondrial central dogma > mtRNA metabolism > mt-rRNA modifications |
| 11   | Pxmp4         | MXP (no annotated function)                                                                                                                     |
| 12   | Sqrdl         | Metabolism > Electron carriers > Q-linked reactions, other   Metabolism > Sulfur metabolism                                                     |
| 13   | Cryz          | MXP (no annotated function)                                                                                                                     |
| 14   | Acot11        | Metabolism > Lipid metabolism > Fatty acid oxidation                                                                                            |

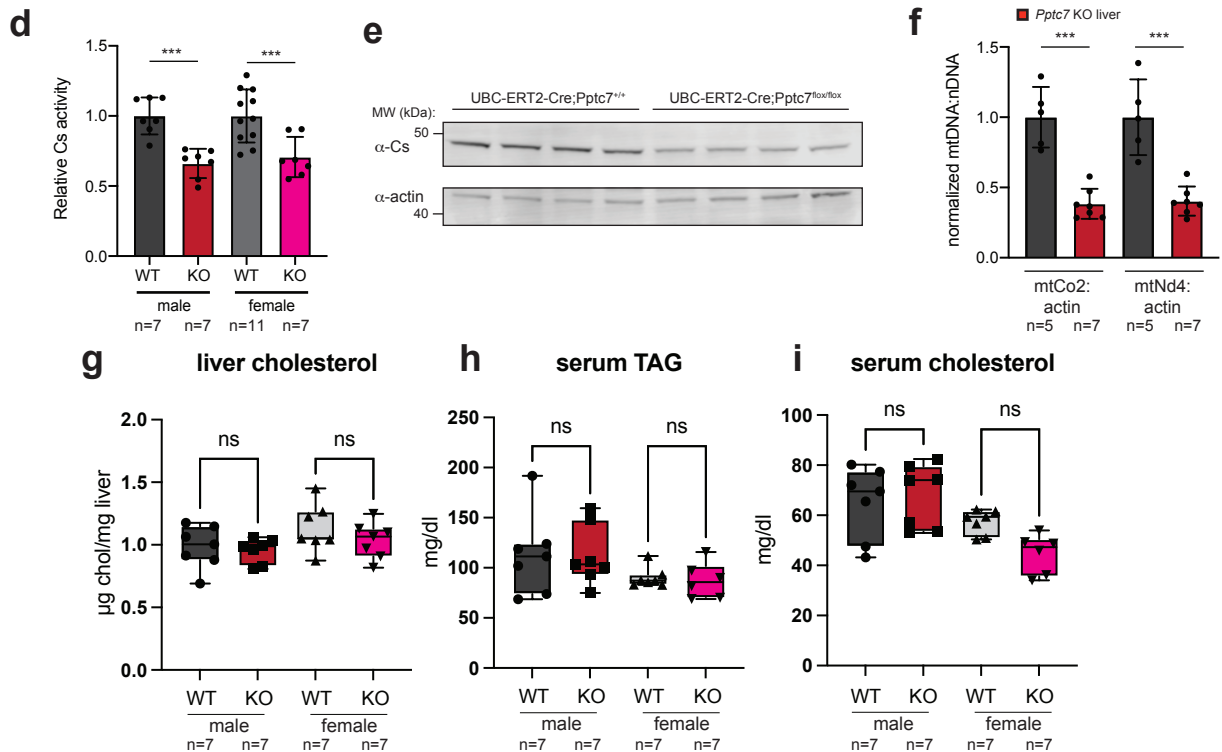

**Supplementary Figure 1: Establishment and validation of the inducible *Pptc7* KO knockout mouse.** **A.** Genotyping for the floxed allele in 11-week-old female mice without (left) and with (right) one week of tamoxifen administration. Genotyping reveals substantial recombination only in the presence of tamoxifen for most tissues assayed. \*represents a non-specific band. Experiment is representative of at least three independent experiments. **B.** Endogenous PPTC7 in floxed mice (left, n=3), Cre-containing wild type mice (middle, n=3), or experimental knockout animals (right, n=3). Only the experimental animals show knockout at the protein level. Experiment is representative of at least three independent experiments. **C.** Table of significantly upregulated mitochondrial proteins in *Pptc7* knockout relative to control liver tissue. BNIP3 and NIX are highlighted. **D.** Citrate synthase (Cs) activity in liver tissue from male and female mice. Each dot represents mean Cs activity from an individual animal, n=7 for male WT, n=7 for male KO, n=11 for female WT, n=7 for female KO; error bars represent standard deviation. \*\*\*p<0.001, two-tailed Student's t test. **E.** Expression of citrate synthase protein in n=4 control (left) or n=4 experimental (right) animals. Actin is shown as a load control. Experiment is representative of at least three independent experiments. **F.** Relative mtDNA levels (compared to nuclear DNA, or nDNA) in male wild type (grey, n=5) or *Pptc7* KO (red, n=7) liver. Error bars represent standard deviation. \*\*\*p<0.001, two-tailed Student's t test. **G.** Liver cholesterol content in male and female wild-type (WT) and *Pptc7* KO mice fasted overnight. Ordinary one-way ANOVA performed. ns = not significant. The box plot extends from the 25<sup>th</sup> to 75<sup>th</sup> percentile; whiskers stretch from minimum to maximum datapoints. The line in the middle of the box plot represents the median. **H.** Serum triacylglycerol content (TAG) in male and female wild-type (WT) and *Pptc7* KO mice fasted overnight. Ordinary one-way ANOVA performed. ns = not significant. The box plot extends from the 25<sup>th</sup> to 75<sup>th</sup> percentile; whiskers stretch from minimum to maximum datapoints. The line in the middle of the box plot represents the median. **I.** Serum cholesterol content in male and female wild-type (WT) and *Pptc7* KO mice fasted overnight. Ordinary one-way ANOVA performed. ns = not significant. The box plot extends from the 25<sup>th</sup> to 75<sup>th</sup> percentile; whiskers stretch from minimum to maximum datapoints. The line in the middle of the box plot represents the median.

## Supplementary Figure 2

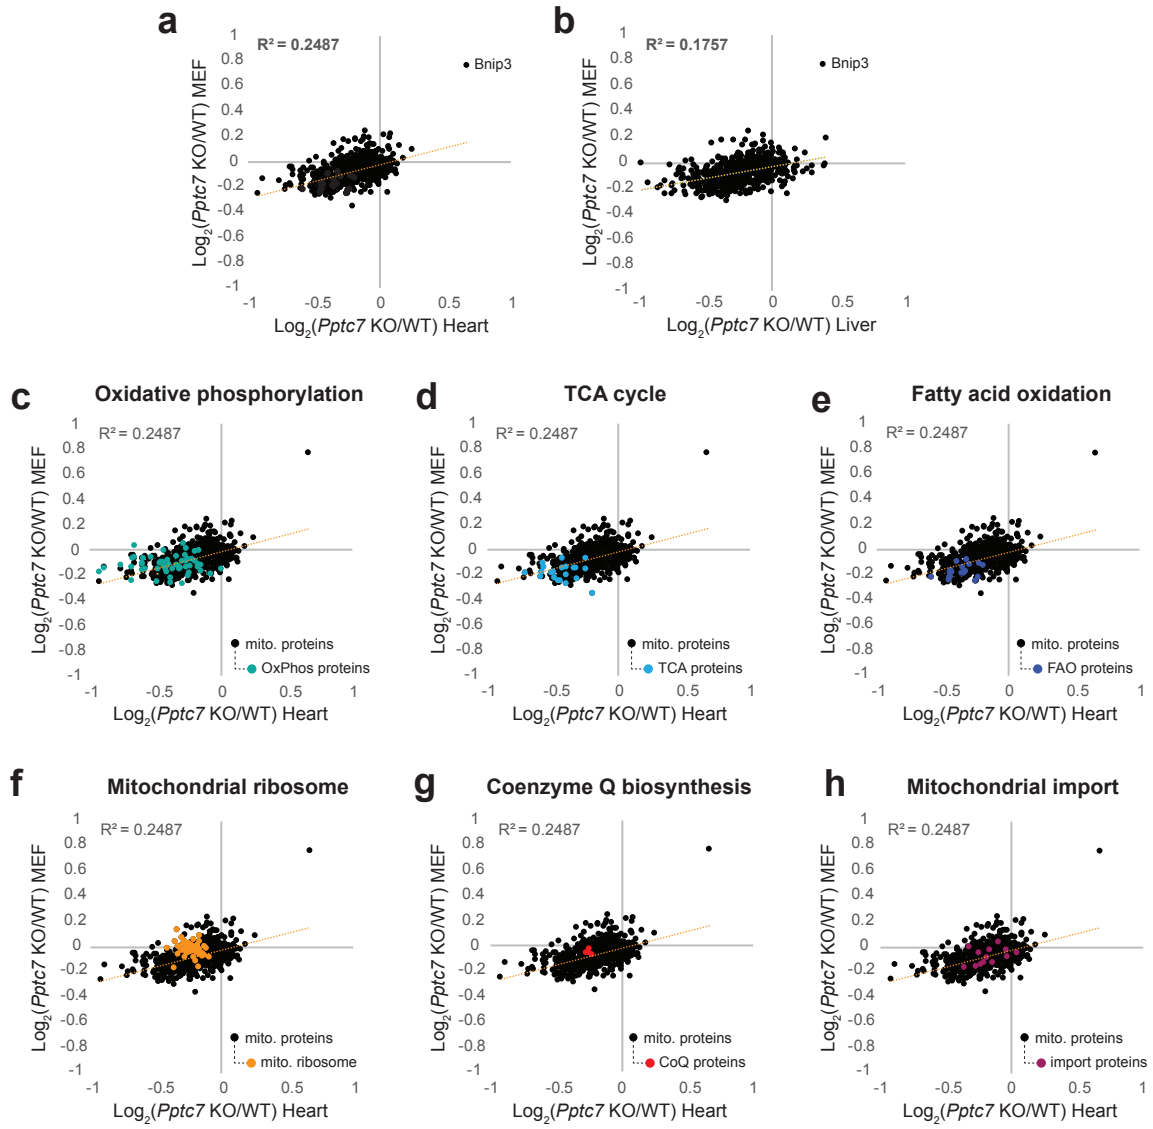

**Supplementary Figure 2:** *Metabolic proteins are amongst the most affected by Pptc7 KO.* **A.**, **B.** Correlation analysis between mitochondrial protein fold changes in *Pptc7* KO MEFs (y-axis) and perinatal heart (x-axis, **A.**) and perinatal liver (x-axis, **B.**). **C.-H.**, Pathway analysis highlighting proteins involved in oxidative phosphorylation (**C.**), the TCA cycle (**D.**), fatty acid oxidation (**E.**), the mitochondrial ribosome (**F.**), coenzyme Q biosynthesis (**G.**), and mitochondrial protein import (**H.**).

# Supplementary Figure 3

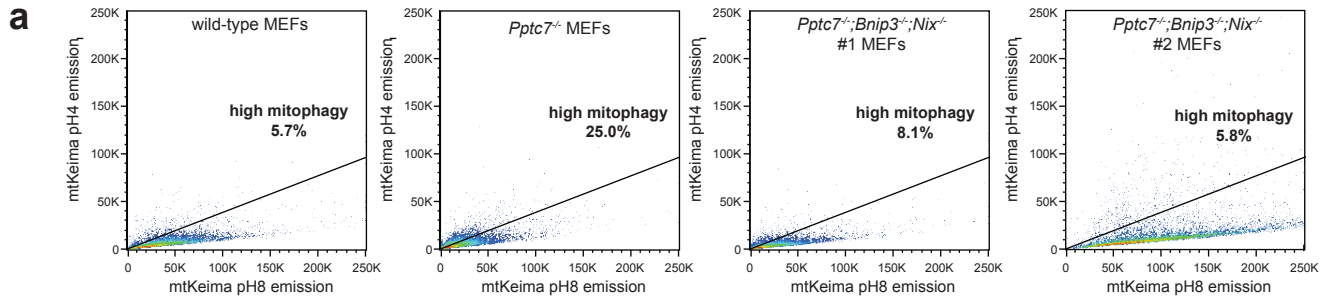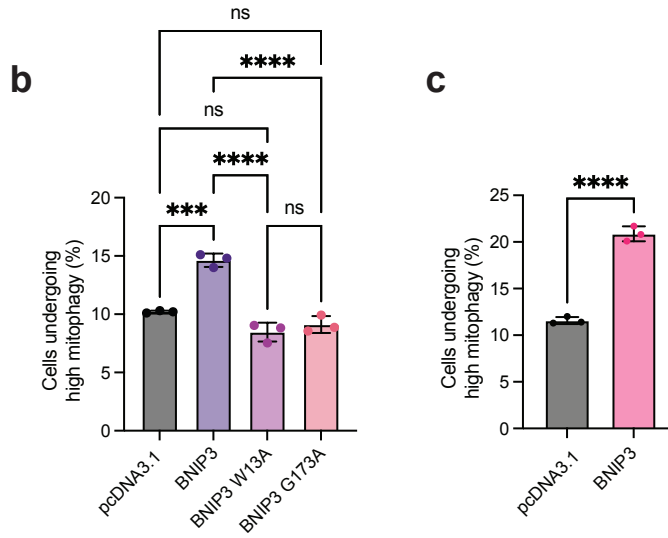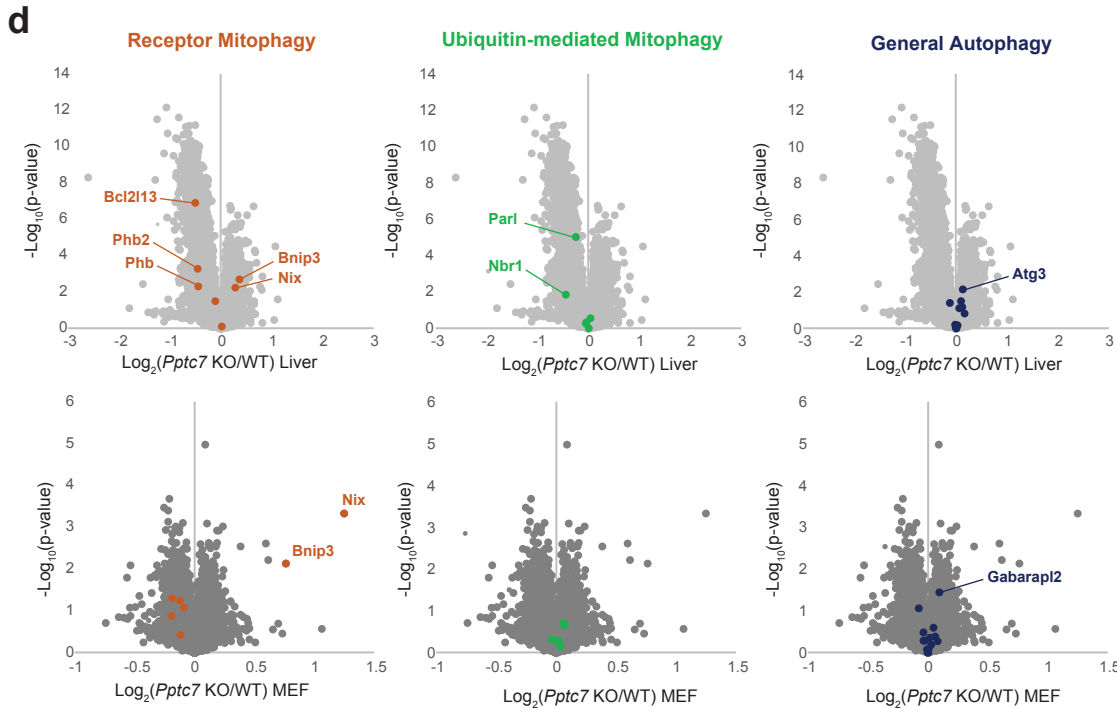

**e**

|                              | MEF    |             | Liver  |             |
|------------------------------|--------|-------------|--------|-------------|
|                              | log2FC | p value     | log2FC | p value     |
| <b>Receptor mitophagy</b>    |        |             |        |             |
| <i>Bcl2l13</i>               | -0.12  | 0.06        | -0.50  | <b>0.00</b> |
| <i>Bnip3</i>                 | 0.76   | <b>0.01</b> | 0.36   | <b>0.01</b> |
| <i>Bnip3l</i>                | 1.25   | <b>0.00</b> | 0.29   | <b>0.02</b> |
| <i>Fkbp8</i>                 | -0.12  | 0.37        | -0.11  | 0.08        |
| <i>Pgam5</i>                 | -0.09  | 0.08        | 0.02   | 0.84        |
| <i>Phb</i>                   | -0.19  | 0.13        | -0.45  | <b>0.02</b> |
| <i>Phb2</i>                  | -0.18  | 0.05        | -0.45  | <b>0.00</b> |
| <i>Ndp52</i>                 | n.q.   |             | n.q.   |             |
| <i>Nbr1</i>                  | 0.04   | 0.72        | -0.45  | <b>0.04</b> |
| <i>Optn</i>                  | 0.03   | 0.63        | -0.05  | 0.64        |
| <i>Parl</i>                  | -0.04  | 0.49        | -0.25  | <b>0.00</b> |
| <i>Sqstm1</i>                | 0.07   | 0.22        | -0.04  | 0.57        |
| <i>Tax1bp1</i>               | 0.06   | 0.20        | 0.01   | 0.97        |
| <i>Tbk1</i>                  | 0.02   | 0.52        | 0.05   | 0.39        |
| <i>Pink1</i>                 | n.q.   |             | n.q.   |             |
| <i>Prkn</i>                  | n.q.   |             | n.q.   |             |
| <b>Ub-mediated mitophagy</b> |        |             |        |             |
| <i>Atg12</i>                 | -0.08  | 0.09        | -0.12  | 0.10        |
| <i>Atg16l1</i>               | 0.02   | 0.43        | 0.00   | 0.99        |
| <i>Atg2a</i>                 | -0.03  | 0.52        | -0.02  | 0.72        |
| <i>Atg2b</i>                 | 0.01   | 0.82        | 0.10   | 0.08        |
| <i>Atg3</i>                  | 0.00   | 0.98        | 0.13   | <b>0.03</b> |
| <i>Atg4a</i>                 | 0.08   | 0.54        |        |             |
| <i>Atg4b</i>                 | -0.04  | 0.52        | 0.00   | 0.98        |
| <i>Atg5</i>                  | -0.01  | 0.85        | 0.07   | 0.16        |
| <i>Atg7</i>                  | 0.02   | 0.65        | 0.03   | 0.76        |
| <i>Atg9a</i>                 | 0.05   | 0.25        | 0.01   | 0.90        |
| <i>Becn1</i>                 | 0.06   | 0.41        | 0.01   | 0.90        |
| <i>Gabarap</i>               | -0.03  | 0.33        | -0.01  | 0.92        |
| <i>Gabarapl1</i>             | n.q.   |             | 0.17   | 0.25        |
| <i>Gabarapl2</i>             | 0.10   | <b>0.04</b> | n.q.   |             |
| <i>Rheb</i>                  | 0.00   | 0.99        | 0.13   | 0.14        |

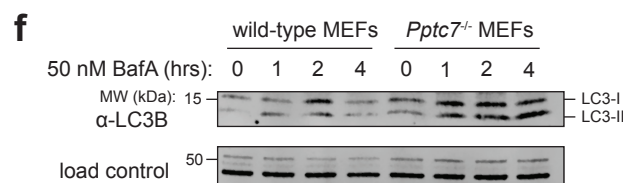

**Supplementary Figure 3: *Pptc7* KO cells undergo elevated mitophagy and autophagy.** **A.** FACS histograms of mt-Keima positive wild-type, *Pptc7* KO, or *Pptc7/Bnip3/Nix* TKO cells. The diagonal line represents the gate; 'high mitophagy' cells were quantified as above this line. **B.** Quantification of cells undergoing high mitophagy rates as quantified via FACS. Wild-type MEFs were stably transfected with pcDNA3.1 (vector only), BNIP3, BNIP3 W13A (a LIR mutant) or BNIP3 G173A (a TM mutant that disrupts dimerization). Dots each represent a biological replicate; error bars represent standard deviation. Ordinary one-way ANOVA performed. \*\*\*\* =  $p < 0.0001$ , \*\*\* =  $p < 0.001$ . **C.** Quantification of cells undergoing high mitophagy rates as quantified via FACS. Wild-type MEFs were stably transfected with pcDNA3.1 (vector only) or NIX. Dots each represent a biological replicate; error bars represent standard deviation. Two-tailed Student's t-test performed. \*\*\*\* =  $p < 0.0001$ , \*\*\* =  $p < 0.001$ . **D., E.** Analysis of proteins identified in receptor-mediated mitophagy (orange), ubiquitination-mediated mitophagy (green), or general autophagy (navy blue) in adult liver tissue (top volcano plots) or MEFs (bottom volcano plots). Significantly changing proteins in *Pptc7* KO cells or tissue relative to control cells or tissue are highlighted. **F.** Table of all quantified proteins involved in receptor-mediated mitophagy (orange), ubiquitination-mediated mitophagy (green), or general autophagy (navy blue). Experiment is representative of at least three independent experiments. **G.** Wild-type or *Pptc7* KO MEFs were treated with 50 nM bafilomycin A for the indicated times. Cells were lysed, run on SDS-PAGE, and Western blotted for LC3. Source data included in Source data file.

# Supplementary Figure 4

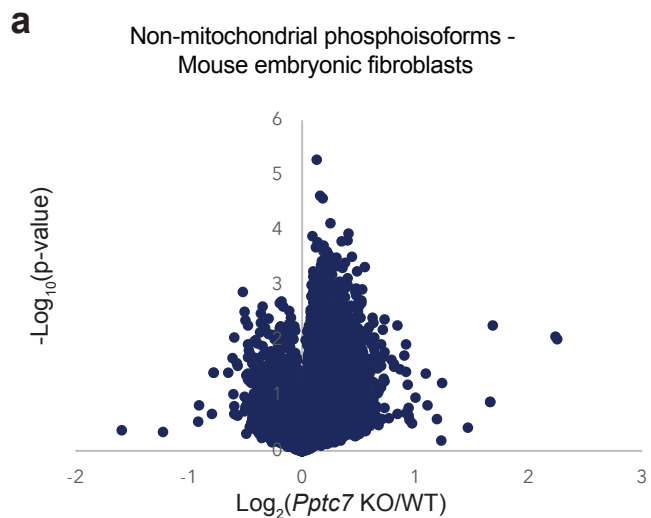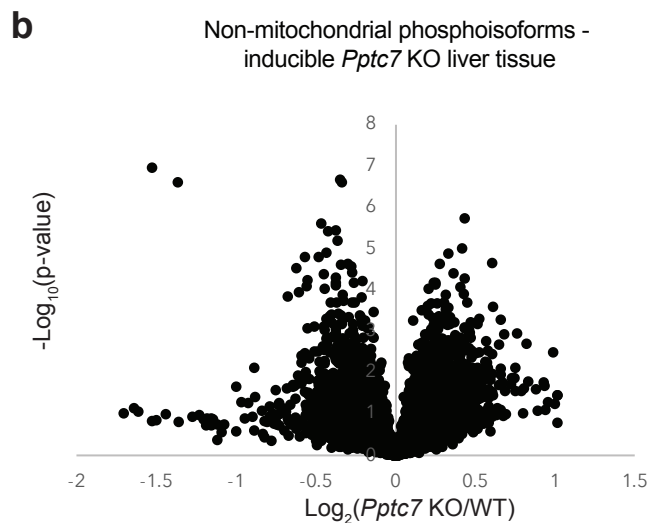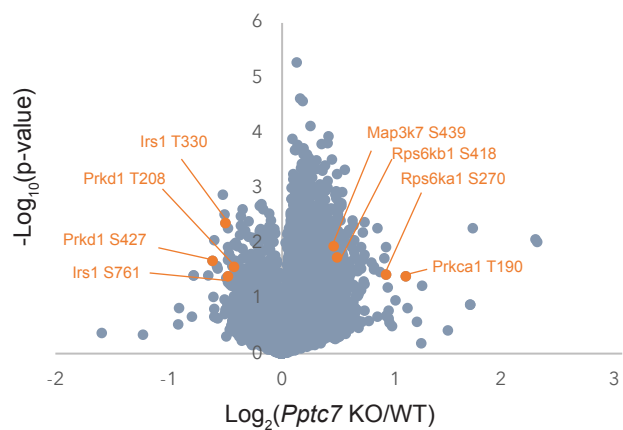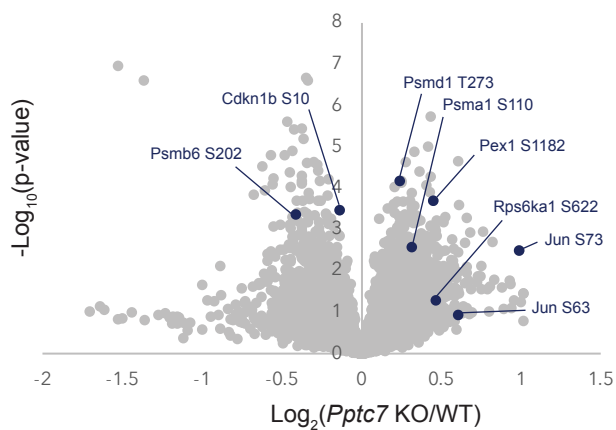



**Supplementary Figure 4:** *Non-mitochondrial phosphoproteome analysis from Pptc7 knockout cells and tissues.* **A.**, **B.** Non-mitochondrial phosphopeptides shown as individual dots as quantified in MEFs (left) or adult mouse liver tissue (right). Distributions of total phosphoproteomes on top; highlights of select non-mitochondrial phosphorylation sites of interest on bottom.

### Supplementary Table 1

Niemi et al. *Pptc7* maintains mitochondrial protein content by suppressing receptor-mediated mitophagy

Sequences of CRISPR reagents used to generate the *Pptc7* conditional mouse (Int23 and Int24) and the sequence of the resulting floxed allele found in the *Pptc7* conditional mouse model are found below.

| CRISPR reagents                                                                                                                                                                                                                                                                                                                                                                                                                                                                                                                                                                                                                                                                                                                                                                                                                                                                                                                                                                                                                                              |                                |
|--------------------------------------------------------------------------------------------------------------------------------------------------------------------------------------------------------------------------------------------------------------------------------------------------------------------------------------------------------------------------------------------------------------------------------------------------------------------------------------------------------------------------------------------------------------------------------------------------------------------------------------------------------------------------------------------------------------------------------------------------------------------------------------------------------------------------------------------------------------------------------------------------------------------------------------------------------------------------------------------------------------------------------------------------------------|--------------------------------|
| Int23                                                                                                                                                                                                                                                                                                                                                                                                                                                                                                                                                                                                                                                                                                                                                                                                                                                                                                                                                                                                                                                        | 5'-CTGGCACTCGTGTCTACAGG_AGG-3' |
| Int34                                                                                                                                                                                                                                                                                                                                                                                                                                                                                                                                                                                                                                                                                                                                                                                                                                                                                                                                                                                                                                                        | 5-'TGCAAGGGACTTGGAATAAG_TGG-'3 |
| Resulting floxed <i>Pptc7</i> allele sequence                                                                                                                                                                                                                                                                                                                                                                                                                                                                                                                                                                                                                                                                                                                                                                                                                                                                                                                                                                                                                |                                |
| TTTGGAGGCTGGGTATGTCCCTGTCTGAAACATCAGTAAATTTAGTGAAGTGTCAGCTGC<br>AGGAACCTTGTTCCAACGACTAAGTAGTAAGACCCAGTAACCTGCTGTGGGGCCTGGCA<br>CTCGTGTCTACATAACTTCGTATAATGTATGCTATACGAAGTTATAGGAGGAGGAACATG<br>GTGCACCTTGCTTACCGTGCTCCACACCCCTTGTCTCAGCACCTCGGGGTTCTCGGG<br>TGTGGGGCAAACCTGGATGGAGCTGAGTGTGACGGGCAGCAGCCCGGGGGAGACAG<br>TGAGCGGATGCCCATGTTGTTTGTAGGTAGCAGCACAGCCTGCATCGTGGTGTCTGGACA<br>GAAGTAGCCACCGCTTGCACACAGCGAACCTGGGTGACTCGGGCTTCCTGGTGGTCCG<br>GGGCGGCGAGGTTGTGCACCGGTCTGACGAGCAGCAGCACTACTTCAACACTCCATTC<br>CAGCTCTCCATCGCCCCTCCTGAGGCCGAGGGGGTTGTCCTGAGCGACAGGTAAGCAA<br>GCAGGAGGTGCCTACCCATCCCTCCCTTCCTCCCTCCTGTCCTTTTCCTGAGACACT<br>GACGTCCTCAGGACCAGTTAGTGGGGCCTTTGCAAGGGACTTGGAATAACTTCGTATA<br>ATGTATGCTATACGAAGTTATTAAGTGGGTATCCCAGCCAAGCCAAGGTGCTCTTACAGA<br>GTCAGCTGGAAGTGTGTGCACAGGCCAGTCCGCCTTCTGTCAGTCCAGTCCTCGGGC<br>AGCCGCACACTGGCTGACGGCCGTCTTACTTGTGAGAATAACTTCCCCTCAGAGGTCC<br>TTCTCACACATGCGCCCAACAGAAGAGAAGTGGCCAGACCTGCCTCCGTCTTAATGGG<br>GTCACTAGGGTGGTCTCTTTTTCTTGATGATTGCTAATGTCTTAGTTTAATTTAACTTCC<br>AGGAACCTTTCAAAACAACCTG |                                |
| LoxP sites in red<br>Exon 3 in blue                                                                                                                                                                                                                                                                                                                                                                                                                                                                                                                                                                                                                                                                                                                                                                                                                                                                                                                                                                                                                          |                                |

## Supplementary Table 2

Niemi et al. *Pptc7* maintains mitochondrial protein content by suppressing receptor-mediated mitophagy

Sequences of primers used to genotype the *Pptc7* conditional mouse. Sequences amplify wild type or floxed allele (as full length or excised/knockout) and the UBC-Cre-ER<sup>T2</sup> recombinase used in this study.

| Primer name        | Sequence                      |
|--------------------|-------------------------------|
| Pptc7 flox forward | 5'-TAGTGAAGTGTCAGCTGCAGGAA-3' |
| Pptc7 flox reverse | 5'-GACTCTGTAAGAGCACCTTGGC-3'  |
| Cre forward        | 5'-GACGTCACCCGTTCTGTTG-3'     |
| Cre reverse        | 5'-AGGCAAATTTTGGTGTACGG-3'    |

### Supplementary Table 3

Niemi et al. *Pptc7 maintains mitochondrial protein content by suppressing receptor-mediated mitophagy*

Sequences of primers used to amplify nuclear DNA ( $\beta$ -actin) and mitochondrial DNA (mtDNA, Mt-Co2 and Mt-Nd4).

| Primer name        | Sequence                     |
|--------------------|------------------------------|
| $\beta$ -actin fwd | 5'-GGCTGTATTCCCCTCCATCG-3'   |
| $\beta$ -actin rev | 5'-CCAGTTGGTAACGCCATGT-3'    |
| Mt-Co2 fwd         | 5'-CGAGTCGTTCTGCCAATAGAA-3'  |
| Mt-Co2 rev         | 5'-CCTGGTCGGTTTGATGTTACT-3'  |
| Mt-Nd4 fwd         | 5'-GCCTCACATCATCACTCCTATT-3' |
| Mt-Nd4 rev         | 5'-GGCTATAAGTGGGAAGACCATT-3' |

**Supplementary Table 4**Niemi et al. *Pptc7 maintains mitochondrial protein content by suppressing receptor-mediated mitophagy*Sequences guide RNAs (gRNAs) and primers for detecting *Bnip3* and *Bnip3l* deletion products post-CRISPR.

| <b>gRNA name</b>                           | <b>gRNA sequence</b>          |
|--------------------------------------------|-------------------------------|
| m.Bnip3.5'.sp2                             | 5'-TCCTGGGAATGTGAATGGGC-3'    |
| m.Bnip3.5'.sp6                             | 5'-AAGTCATCAAGCCCCACAAG-3'    |
| m.Bnip3.3'.sp17                            | 5'-ATCTGGGGCTCAAGTCTAGA-3'    |
| m.Bnip3.3'.sp9                             | 5'-CCAGGTCTGAGGCCACATTT-3'    |
| m.Bnip3l.5'.sp10                           | 5'-TATTATCTGACTCGTCCAAC-3'    |
| m.Bnip3l.5'.sp4                            | 5'-TTATCTGAACTCAAGCATGT-3'    |
| m.Bnip3l.3'.sp1                            | 5'-TGTAGCGTACATGTTTAAAC-3'    |
| m.Bnip3l.3'.sp14                           | 5'-TAAGCACTTGATGTCAAAC-3'     |
| <b>Primers for deletion and inside PCR</b> |                               |
| Bnip3 deletion – m.Bnip3.5F                | 5'-TGGCCTCTGGTAAATCACAGA-3'   |
| Bnip3 deletion – m.Bnip3.3R                | 5'-GTAGTGCTGCCTAGGAACCG-3'    |
| Bnip3 inside – m.Bnip3.inside.F            | 5'-TAGTCCTGCCTAGCCTTGAA-3'    |
| Bnip3 inside – m.Bnip3.inside.R            | 5'-GCAACCCACCCACAAAAACAT-3'   |
| Bnip3l deletion – m.Bnip3.5F               | 5'-AACTAACTGGCTGGAGAGC-3'     |
| Bnip3l deletion – m.Bnip3.3R               | 5'-GTGTATATGTGGAAGCCAGAGGA-3' |
| Bnip3l inside – m.Bnip3l.inside.F          | 5'-GTTCTTCCTCGTCTTCCATCCA-3'  |
| Bnip3l inside – m.Bnip3l.inside.R          | 5'-GCAATGAGCTTGCCCCTTGTA-3'   |
