# Supplementary material for: PPTC7 maintains mitochondrial protein content by suppressing receptor-mediated mitophagy
Source: PubMed Central journal article supplement (PMC10575892; doi:10.1038/s41467-023-42069-w), 2023-10-13
Supplement: 41467_2023_42069_MOESM3_ESM.pdf [file 41467_2023_42069_MOESM3_ESM.pdf]

## **Description of Additional Supplementary Files**

### **File name: Supplementary Data 1**

Description: Inducible Liver proteomics

### **File name: Supplementary Data 2**

Description: MEF proteomics

### **File name: Supplementary Data 3**

Description: TKO MEF proteomics
